# Supplementary material for: Decompression Illness in Repetitive Breath-Hold Diving: Why Ischemic Lesions Involve the Brain?
Source: Frontiers journal article supplement (doi:10.3389/fphys.2021.711850), 2021-09-03
Supplement: Data_Sheet_1.docx [file Data_Sheet_1.docx]

**Table 1. Clinical manifestations of decompression illness in compressed-air and breath-hold divers**

|  | Breath-hold divers  (Wong, 2006) | Compressed-air divers  (Vann et al., 2011) |
| --- | --- | --- |
| Non-neurological | - Dizziness/ vertigo - Constitutional* - Pain - Cardiovascular | - Pain - Constitutional - Dizziness/ vertigo - Cutaneous - Muscle discomfort - Pulmonary - Auditory - Lymphatic - Cardiovascular |
| Neurological | - Motor weakness - Numbness/ paresthesia - Consciousness - Mental status - Altered speech - Visual disturbance - Coordination - Convulsions - Bladder/ bowel | - Numbness/ paresthesia - Motor weakness - Mental status - Coordination - Consciousness - Bladder/ bowel |

*Constitutional symptoms include headache, fatigue, agitation, nausea and vomiting.

**Table 2. Diving events in different types of breath-hold divers**

|  | Spanish spearfishermen (25 cases) (Batle, 1999) | Japanese Ama divers (12 cases)  (Tamaki et al., 2010a) | Competitive athletes (4 cases) (Tetzlaff et al., 2017) |
| --- | --- | --- | --- |
| Manifestation | - Constitutional (23)* - Numbness/ paresthesia (17) - Consciousness (13) - Motor weakness (11) - Visual disturbance (10) - Altered speech (7) - Dizziness/ vertigo (5) - Coordination (5) - Memory loss (4) - Convulsions (1) - Sphincter relaxation (1) - Auditory disturbance (1) - Cardiorespiratory arrest (1) - Pain (1) | - Dizziness/ vertigo (8) - Numbness/ paresthesia (8) - Motor weakness (6) - Altered speech (3) - Constitutional (2) - Pain (2) - Visual disturbance (1) | - Numbness/ paresthesia (3) - Motor weakness (2) - Altered speech (2) - Dizziness/ vertigo (1) - Unconsciousness (1) |

* Parenthesis means total number of cases.
